# Supplementary material for: Electrochemical behaviour of new dimeric esters and amides derived from caffeic acid in dimethylsulfoxide
Source: Royal Society of Chemistry journal article supplement (doi:10.1039/c4ob00823e), 2014-06-11
Supplement: c4ob00823e1.pdf [file c4ob00823e1.pdf]

*Supporting Information*

*for*

**Electrochemical behaviour of new dimeric esters and amides  
derived from caffeic acid in dimethylsulfoxide**

Analilia Sánchez, Omar Martínez-Mora, Evelin Martínez-Benavidez,  
Javier Hernández, Zaira Domínguez\* and Magali Salas-Reyes\*

Unidad de Servicios de Apoyo en Resolución Analítica, Universidad Veracruzana,  
Apdo. Postal 575, Xalapa, Ver., México

\* Corresponding authors.

E-mail addresses: magasalas@uv.mx (Magali Salas-Reyes), zdominguez@uv.mx (Zaira  
Domínguez)

**Table of contents**

|                                                                         |    |
|-------------------------------------------------------------------------|----|
| 1. Cyclic voltammetry of compound <b>6</b> at different scan rates..... | S1 |
| 2. Cyclic voltammetry of compound <b>8</b> at different scan rates..... | S2 |
| 3. <sup>13</sup> C NMR spectrum of compound <b>6</b> .....              | S3 |
| 4. <sup>13</sup> C NMR spectrum of compound <b>7</b> .....              | S4 |
| 5. <sup>13</sup> C NMR spectrum of compound <b>8</b> .....              | S5 |
| 6. <sup>13</sup> C NMR spectrum of compound <b>9</b> .....              | S6 |

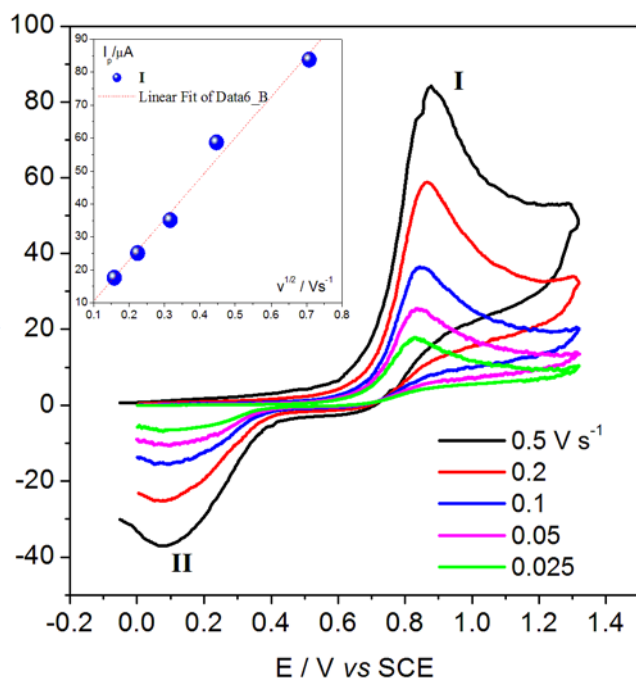

**Figure S1.** Cyclic voltammetry of compound **6** at different scan rates (from 0.025 to 0.5 V s<sup>-1</sup>). Insert: dependence of the anodic peak current  $I$  on the square root of the potential scan rate ( $v$ ).

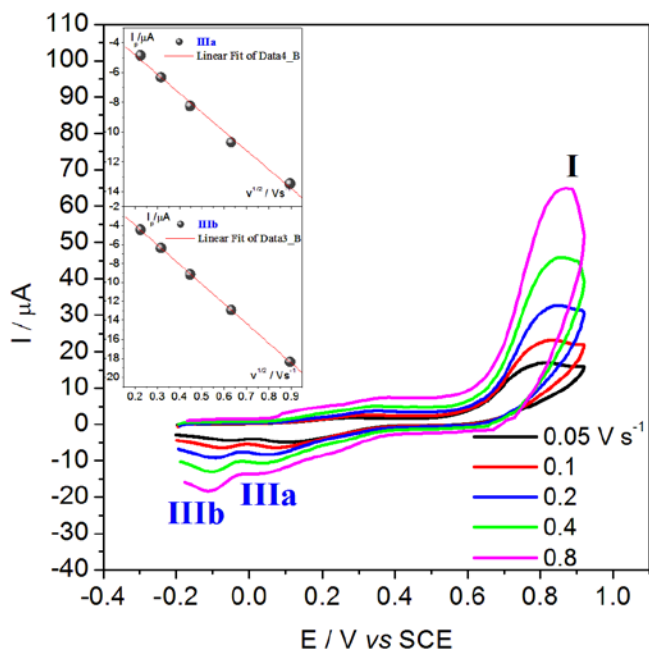

**Figure S2.** Cyclic voltammetry of compound **8** at different scan rates (from 0.05 to 0.8 V s<sup>-1</sup>). Insert: dependence of the cathodic peak current **IIIa** and **IIIb** on the square root of the potential scan rate ( $v$ ).

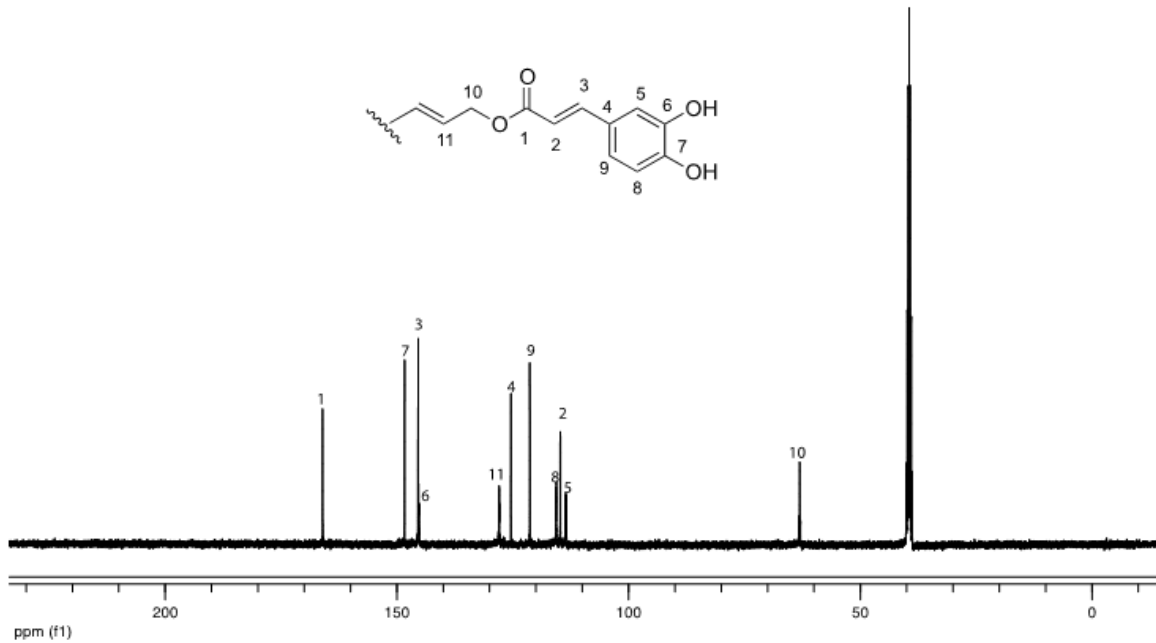

**Figure S3.** <sup>13</sup>C NMR spectrum of compound **6** (100.5 MHz; d<sub>6</sub>-DMSO).

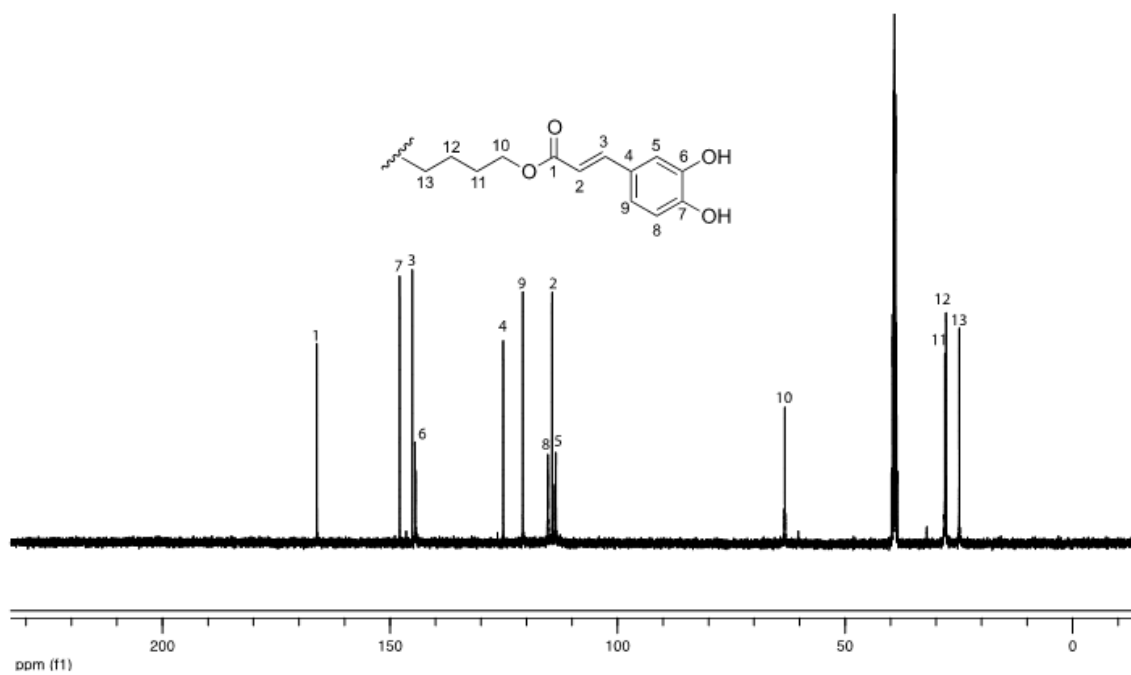

**Figure S4.**  $^{13}\text{C}$  NMR spectrum of compound 7 (100.5 MHz;  $\text{d}_6$ -DMSO).

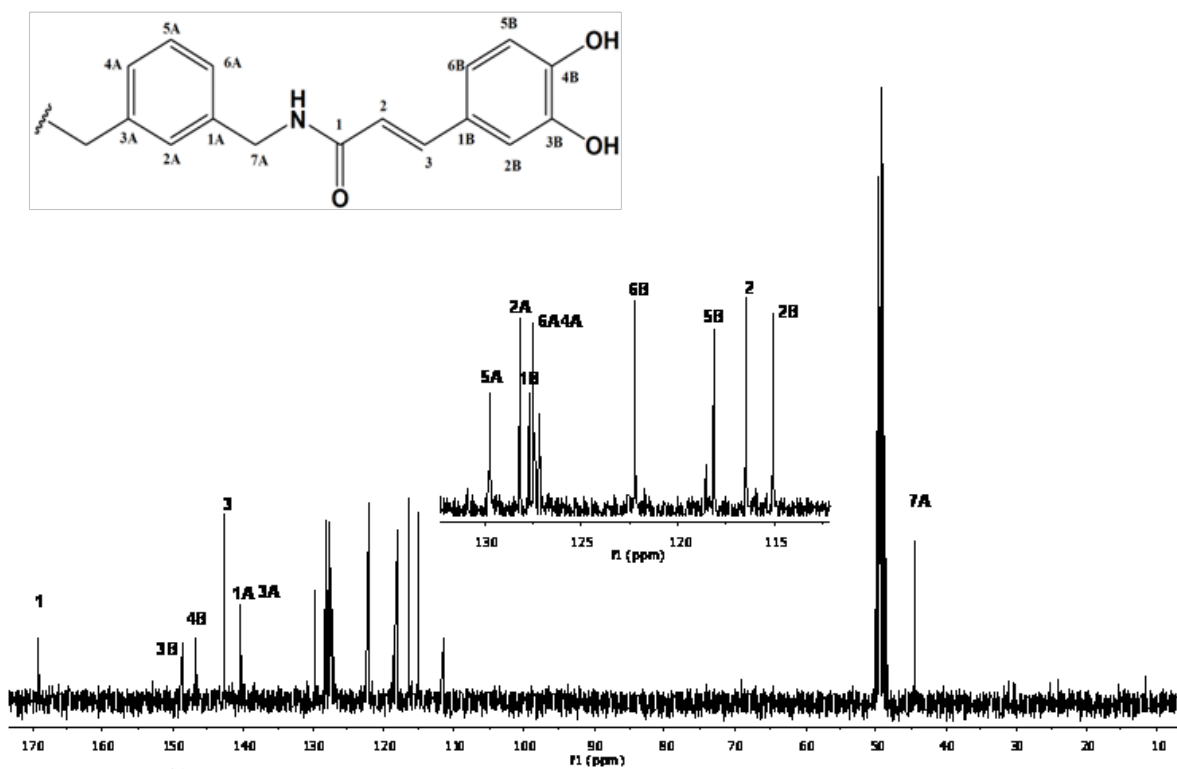

**Figure S5.** <sup>13</sup>C NMR spectrum of compound **8** (75.5 MHz; CD<sub>3</sub>OD).

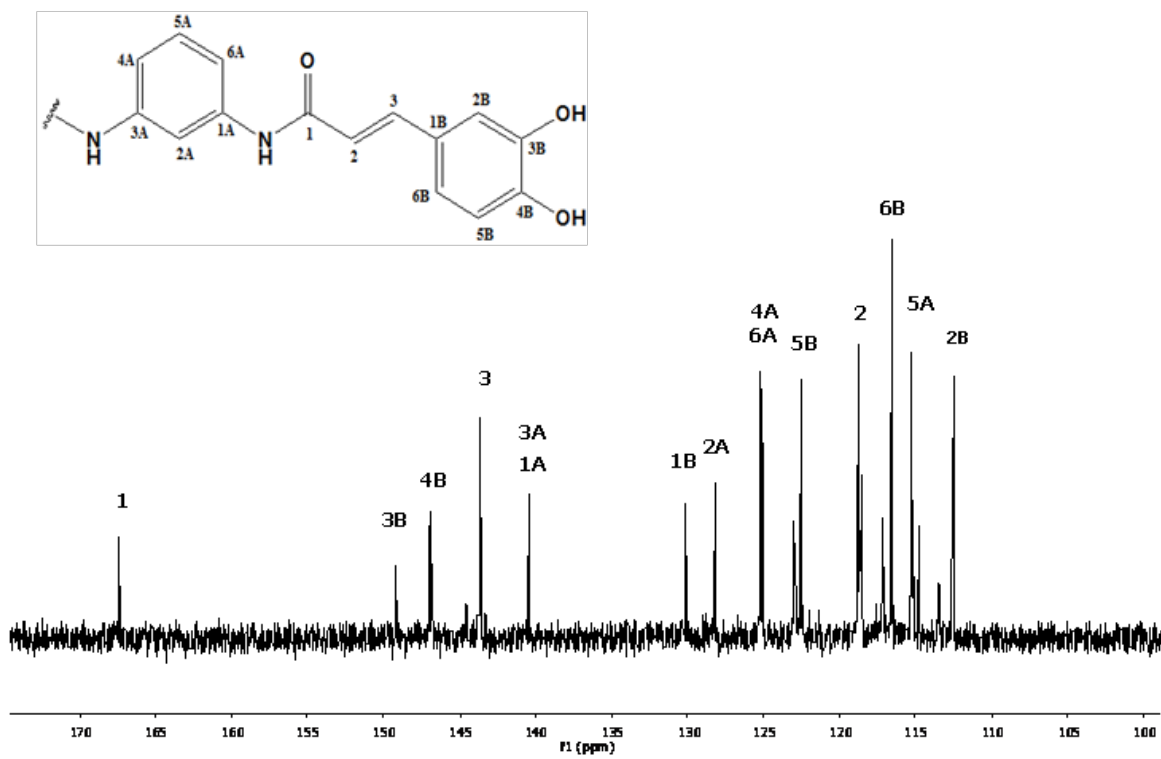

**Figure S6.** <sup>13</sup>C NMR spectrum of compound 9 (75.5 MHz; CD<sub>3</sub>OD).
